# Supplementary material for: Nucleation kinetics, growth, mechanical, thermal and optical characterization of sulphamic acid single crystal
Source: Royal Society of Chemistry journal article supplement (doi:10.1039/c3ce41397g), 2013-01-01
Supplement: c3ce41397g.pdf [file c3ce41397g.pdf]

## Supporting Information

### Nucleation Kinetics, Growth, Mechanical, Thermal and Optical characterization of Sulphamic Acid single crystal<sup>†</sup>

Suraj Karan Jat<sup>1,2</sup>, N.Vijayan<sup>1,\*</sup>, Anuj Krishna<sup>1</sup>, J. Philip<sup>3</sup>, Sunil Verma<sup>4</sup>, Igor Bdikin<sup>5</sup>, Budhendra Singh<sup>5</sup>, G. Bhagavannarayana<sup>1</sup> and S.K. Halder<sup>1</sup>

<sup>1</sup>CSIR-National Physical Laboratory, New Delhi- 110012, India

<sup>2</sup>Centre for Converging Technology, University of Rajasthan, Jaipur 302004, India

<sup>3</sup>Cochin University of Science & Technology, Cochin-682022, India

<sup>4</sup>Laser Materials Development and Devices Division, Raja Ramanna Centre for Advanced Technology, Indore-452013, India

<sup>5</sup>TEMA-NRD, Mechanical Engineering Department and Aveiro Institute of Nanotechnology (AIN), University of Aveiro, 3810-193 Aveiro, Portugal

#### 1. Nucleation theory and details for calculation of thermodynamical parameters:

Nucleation process is an important phenomenon in case of liquid–solid phase transition. According to the classical theory of homogeneous nucleation<sup>1-3</sup> nucleation parameters (interfacial tension ( $\sigma$ ), free energy of formation ( $\Delta G$ ) of the critical nucleus and radius of the nucleus ( $r$ ) in equilibrium with its solution) can be calculated using the induction period. According to this theory the sum of the surface excess free energy ( $\Delta G_s$ ) and the volume excess free energy ( $\Delta G_v$ )<sup>4</sup> gives the overall excess Gibbs free energy ( $\Delta G$ ) between an embryo and solute in the solution, and is given by

$$\Delta G = \Delta G_s + \Delta G_v \quad (1)$$

where  $\Delta G_v$  is given as

$$\Delta G_v = -kT(\ln S)/v \quad (2)$$

The free energy required to form a spherical nucleus is given by

$$\Delta G = 4\pi r^2 \sigma + 4/3\pi r^3 \Delta G_v \quad (3)$$

The formation of clusters (with mean radius,  $r$ ) of solute molecules starts when it reaches a critical size ( $r = r_c$ ).<sup>5</sup> After this stage, ( $r > r_c$ ), the cluster becomes visible and is termed as nucleus, which eventually grows into crystal. If ( $r < r_c$ ), the cluster dissolves and does not yield to a crystal. At the critical state, the free energy of formation obeys the condition  $d(\Delta G)/dr = 0$ . Hence the radius of the critical nucleus is expressed as

$$r_c = -2\sigma / \Delta G_v \quad \text{or} \quad r_c = 2\sigma v / kT \ln S \quad (4)$$

The interfacial tension has been calculated using the experimentally measured induction period values by the relation

$$\ln \tau = -\ln B + 16\pi\sigma^3 v^2 N / 3R^3 T^3 (\ln S)^2 \quad (5)$$

The function  $\ln B$  weakly depends on temperature and hence there is a linear dependence between  $\ln \tau$  and  $(\ln S)^2$ . Bennema and Sohnel<sup>6-7</sup> have derived the expression for the linear dependence of interfacial tension ( $\sigma$ ) with respect to solubility is given by

$$\sigma = kT/a_0^2 (0.174 - 0.248 \ln(S)) \quad (6)$$

The critical free energy barrier is

$$\Delta G_c = 16\pi\sigma^3 / 3(\Delta G_v)^2 \quad (7)$$

where  $v$  is the molar volume,  $R$  is the gas constant,  $\sigma$  is the interfacial tension,  $K$  is the Boltzmann's constant,  $T$  is Saturation temperature in Kelvin,  $a_0$  is the inter atomic distance,  $S$  is the supersaturation ( $S = C/C^*$ ) where  $C$  is actual concentration and  $C^*$  is the equilibrium concentration.

The interfacial tension ( $\sigma$ ), volume free energy ( $\Delta G_v$ ), critical free energy ( $\Delta G_c$ ), and radius of the critical nucleus ( $r_c$ ) of SA were calculated at different supersaturation ratios and the details of which are included in Table 1.

| Saturation temperature (°C) | $S = C / C^*$ | $(\sigma) * 10^{-4}$<br>(in $Jm^{-2}$ ) | $\Delta G_v * 10^6$<br>(in $Jm^{-3}$ ) | $(\Delta G^*) * 10^{-23}$<br>(in J) | $(r^*)$<br>(in nm) |
|-----------------------------|---------------|-----------------------------------------|----------------------------------------|-------------------------------------|--------------------|
| <b>40</b>                   | 1.1           | 3.008                                   | -5.4847                                | 1.512                               | 0.1095             |
|                             | 1.2           | 2.586                                   | - 10.4895                              | 0.2627                              | 0.0492             |
|                             | 1.3           | 2.198                                   | - 15.0985                              | 0.0779                              | 0.029              |
|                             | 1.4           | 1.839                                   | - 19.3622                              | 0.0277                              | 0.0189             |
| <b>45</b>                   | 1.1           | 3.056                                   | - 5.5729                               | 1.536                               | 0.1095             |
|                             | 1.2           | 2.627                                   | - 10.6582                              | 0.2669                              | 0.0492             |
|                             | 1.3           | 2.233                                   | - 15.34032                             | 0.0791                              | 0.0290             |
|                             | 1.4           | 1.868                                   | - 19.6735                              | 0.0281                              | 0.0189             |
| <b>50</b>                   | 1.1           | 3.104                                   | - 5.6525                               | 1.560                               | 0.1095             |
|                             | 1.2           | 2.669                                   | - 10.8269                              | 0.2711                              | 0.0492             |
|                             | 1.3           | 2.269                                   | - 15.5815                              | 0.0804                              | 0.0290             |
|                             | 1.4           | 1.898                                   | - 19.9840                              | 0.0286                              | 0.0189             |
| <b>55</b>                   | 1.1           | 3.152                                   | -5.7400                                | 1.585                               | 0.1095             |
|                             | 1.2           | 2.710                                   | -10.9945                               | 0.0275                              | 0.0492             |
|                             | 1.3           | 2.304                                   | -15.8227                               | 0.0816                              | 0.0290             |
|                             | 1.4           | 1.927                                   | -20.2933                               | 0.0290                              | 0.0189             |

**Table 1:** Interfacial tension ( $\sigma$ ), Volume free energy ( $\Delta G_v$ ), Critical free energy ( $\Delta G_c$ ) and Critical radius ( $r_c$ ).

## 2. Details of Nanoindentation measurement and calculations:

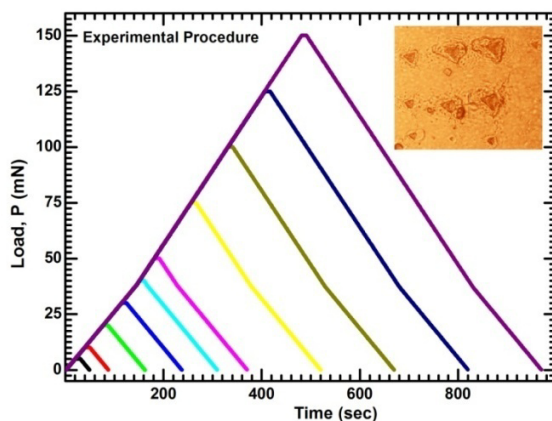

**Fig.1.** The load time sequence used in the experimental procedure with loading and unloading rate as 20.00 mN/min and a dwell time of 10 s at each peak load (Inset to figure shows optical image of a typical imprint made by berkovich nanoindenter on the sulphamic acid crystal)

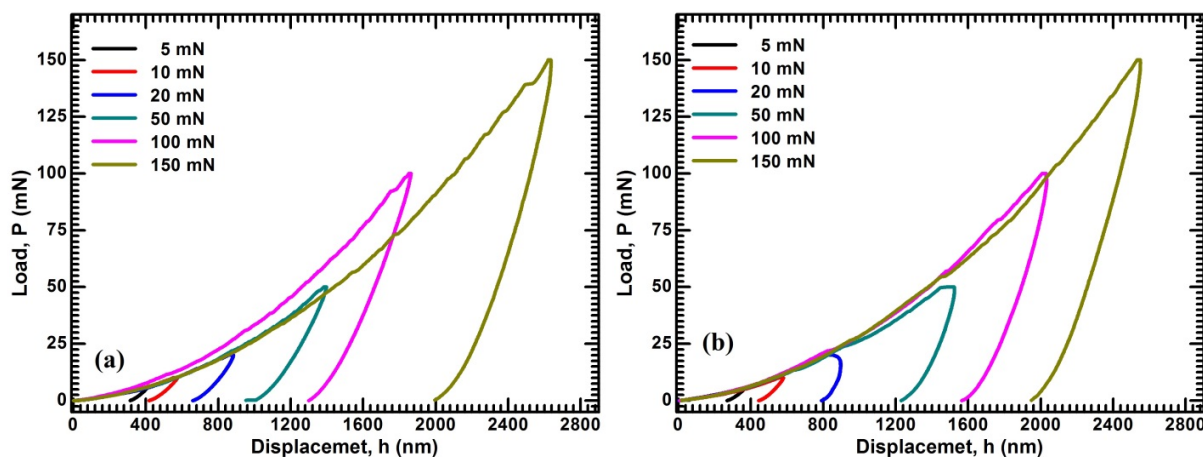

**Fig.2.** A Typical load-displacement curve on the sulphamic acid crystal (a) along (100) and (b) along (011).

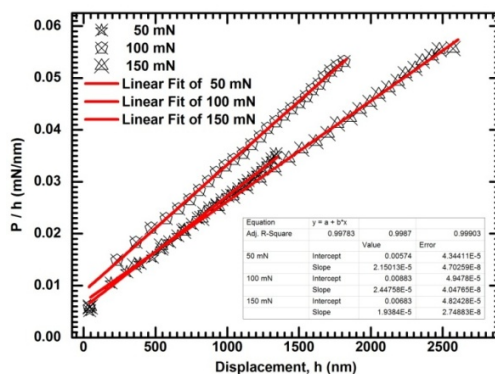

**Fig. 3.** The experimental data in the loading segments of the load displacement curves from Fig.1 were re-plotted in a P/h versus h scale.

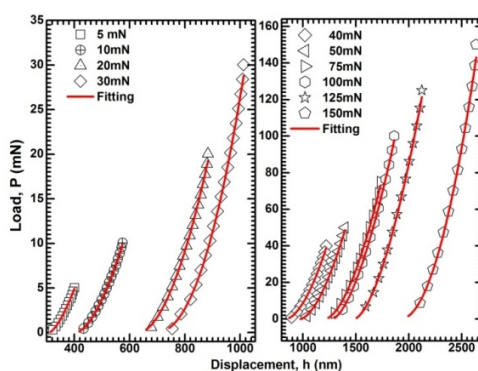

**Fig. 4.** The experimental data in the unloading segments of the load displacement curves from Fig.2 were fitted with power equation.

| Load   | A        |          | m     |          | $h_f$   |       | Statistics       |               |
|--------|----------|----------|-------|----------|---------|-------|------------------|---------------|
|        | Value    | Error    | Value | Error    | Value   | Error | Reduced $\chi^2$ | Adj. R-Square |
| 5 mN   | 6.49E-03 | 2.72E-04 | 1.47  | 8.20E-03 | 309.02  | 0.31  | 7.96E-04         | 0.9996        |
| 10 mN  | 2.05E-03 | 1.07E-04 | 1.65  | 8.97E-03 | 406.06  | 0.60  | 2.91E-03         | 0.9997        |
| 20 mN  | 7.02E-04 | 8.66E-05 | 1.85  | 1.95E-02 | 631.59  | 1.88  | 3.61E-02         | 0.9989        |
| 30 mN  | 1.18E-04 | 1.96E-05 | 2.15  | 2.50E-02 | 694.13  | 2.84  | 7.33E-02         | 0.999         |
| 40 mN  | 1.14E-03 | 8.70E-05 | 1.75  | 1.13E-02 | 836.04  | 1.69  | 6.61E-02         | 0.9995        |
| 50 mN  | 1.78E-03 | 1.07E-04 | 1.69  | 8.82E-03 | 972.77  | 1.47  | 7.43E-02         | 0.9996        |
| 75 mN  | 1.51E-03 | 7.70E-05 | 1.72  | 7.22E-03 | 1206    | 1.49  | 1.13E-01         | 0.9998        |
| 100 mN | 3.41E-03 | 1.29E-04 | 1.61  | 5.31E-03 | 1275.69 | 1.24  | 1.47E-01         | 0.9998        |
| 125 mN | 2.32E-03 | 1.32E-04 | 1.68  | 7.82E-03 | 1478.52 | 1.99  | 4.14E-01         | 0.9997        |
| 150 mN | 3.16E-04 | 4.71E-05 | 1.98  | 1.99E-02 | 1922.47 | 5.28  | 1.86E+00         | 0.9991        |

**Table 2:** Values obtained after non linear fitting of the experimental data (Fig.4) with power equation.

| Peak load, $P_{\max}$ (mN) | Displacement, $h_{\max}$ (nm) | Initially unloading stiffness, $S$ ( $\text{mN} \times \text{nm}^{-1}$ ) | Contact depth, $h_c$ (nm) | Hardness, $H$ (MPa) |
|----------------------------|-------------------------------|--------------------------------------------------------------------------|---------------------------|---------------------|
| 5.033                      | 399.880                       | 0.079432                                                                 | 352.3584                  | 1654.59             |
| 10.054                     | 574.784                       | 0.094821                                                                 | 495.2602                  | 1673.04             |
| 20.056                     | 882.866                       | 0.142442                                                                 | 777.2649                  | 1355.00             |
| 30.023                     | 1012.274                      | 0.191575                                                                 | 894.7362                  | 1530.73             |
| 40.079                     | 1219.231                      | 0.172784                                                                 | 1045.261                  | 1497.27             |
| 50.070                     | 1396.351                      | 0.195386                                                                 | 1204.154                  | 1409.44             |
| 75.053                     | 1732.566                      | 0.236566                                                                 | 1494.62                   | 1371.32             |
| 100.059                    | 1863.000                      | 0.268281                                                                 | 1583.277                  | 1629.21             |
| 125.043                    | 2124.024                      | 0.317343                                                                 | 1828.5                    | 1526.52             |
| 150.08                     | 2635.615                      | 0.391261                                                                 | 2347.93                   | 1111.19             |

**Table 3:** Best-fit results for the unloading segments of measured load-displacement curves

### 3. Curves obtained from photopyroelectric (PPE) technique for calculation of thermal parameters

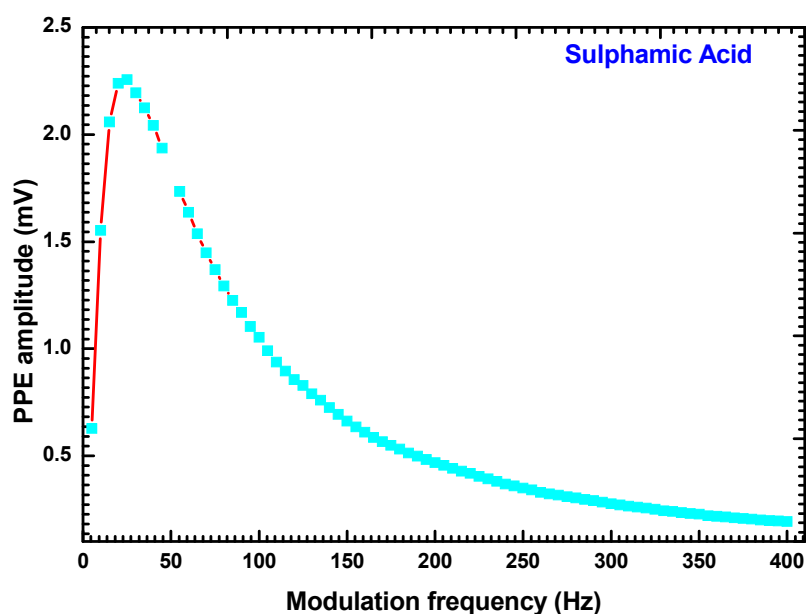

**Fig. 5a.** Frequency dependent PPE amplitude of SA single crystal.

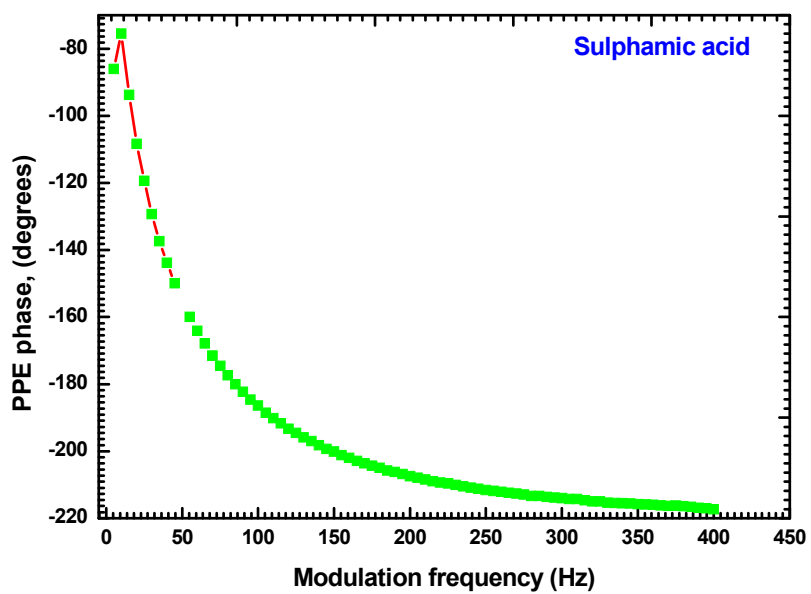

**Fig. 5b.** Frequency dependent PPE phase of SA single crystal.

#### 4. FT-Raman Analysis

To confirm the formation of the functional groups of the compound, the FT-Raman spectrum of the grown SA single crystal was recorded in the wavelength ranging from 100-4000  $\text{cm}^{-1}$  using Renishaw inVia Raman microscope as shown in Fig. 20. The absorption peaks obtained at 3200  $\text{cm}^{-1}$  represents degenerated  $\text{NH}_3^+$  stretch, 3140 represents symmetric  $\text{NH}_3^+$  stretch, 1542  $\text{cm}^{-1}$  represents degenerated  $\text{NH}_3^+$  deformation, 1312  $\text{cm}^{-1}$  represents degenerated  $\text{SO}_3^-$  stretch, 1262  $\text{cm}^{-1}$  represents symmetric  $\text{SO}_3^-$  stretch, 1064  $\text{cm}^{-1}$  represents symmetric  $\text{SO}_3^-$  deformation, 1015 and 1000  $\text{cm}^{-1}$  represents degenerated  $\text{NH}_3^+$  rock, 682  $\text{cm}^{-1}$  representing N-S stretch, 540 and 526  $\text{cm}^{-1}$  represents degenerated  $\text{SO}_3^-$  deformation in FT-Raman spectra vibration in the grown single crystal.<sup>8</sup> The presence of these bands in the spectrum confirms the formation of SA single crystal.

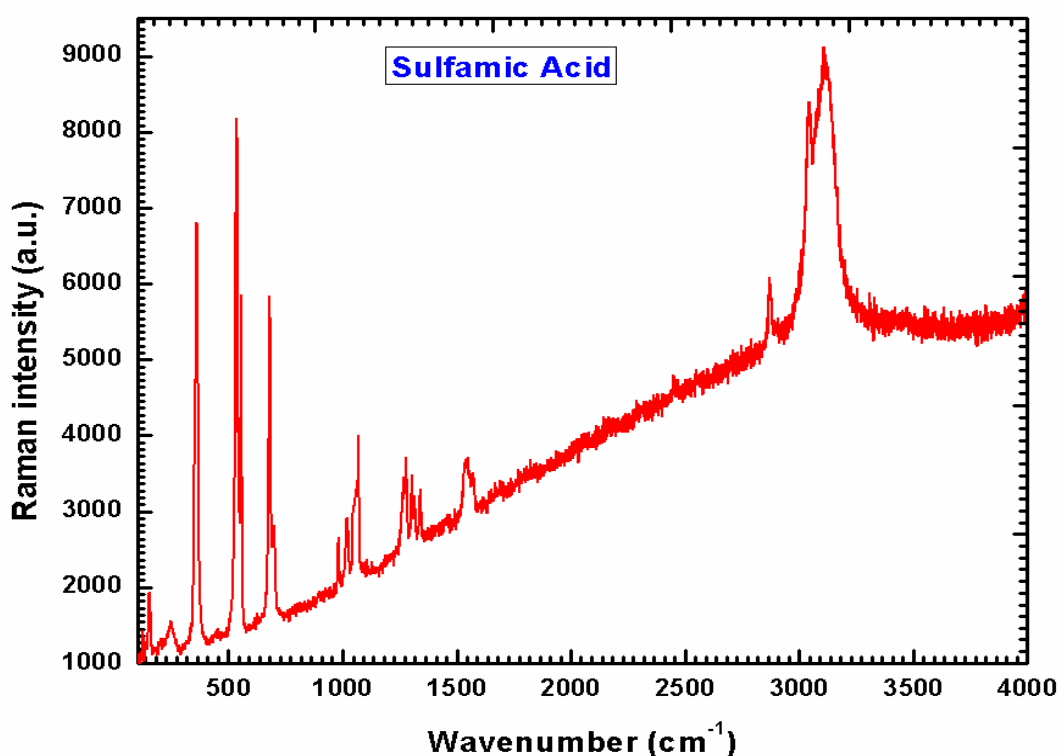

**Fig.6.** FT-Raman spectrum of SA single crystal.



## References

- 1 A.E. Nielson, S. Aig, *J. Cryst. Growth*,1971,8,1-7.
- 2 M. Volmer, A. Weber, *Z. Phys. Chem.*,1926, 119, 277-301.
- 3 P.M. Ushasree. R. Muralidharan, R. Jayavel, P. Ramasamy, *J. Cryst. Growth*,2000, 210,741-745.
- 4 S. Vasudevan, S. Nagalingam, P. Ramasamy, G.S. Laddha, *Kristall Technick*,1979,14,373-377
- 5 J.P. Ribet, R. Pena, A. Chauvet, J. F. Patoiseau, J.M. Autin, R. Segonds, M. Basquin, J.M. Autret, *Ann. Pharm. Fr.*,2002, 60,177–186.
- 6 O. Sohnel, *J. Cryst. Growth*,1982,57, 101-108.
- 7 P. Bennema, O. Sohnel, *J. Cryst. Growth*,1990, 102, 547-556.
- 8 M. Canagaratna, J.A. Phillips, H. Goodfriend, K.R. Leopold, *J. Am. Chem. Soc.*,1996, 118, 5290-5295.
